# Supplementary material for: Peripheral B-Cell Subset Distribution in Primary Antiphospholipid Syndrome
Source: PubMed Central journal article supplement (PMC5855811; doi:10.3390/ijms19020589), 2018-02-16
Supplement: ijms-19-00589-s001.pdf [file ijms-19-00589-s001.pdf]

**Table S1. B cells disturbances in APS according to previous literature.**

| Author              | N of patients                                                                                                                                                                                                                             | Material and Methods                                                                                                                                                                                                                                             | B cells                                                                                                                                                                                                                                             | Results                                                                                                                                                                                                                                                                                                                                                                                                                                      |
|---------------------|-------------------------------------------------------------------------------------------------------------------------------------------------------------------------------------------------------------------------------------------|------------------------------------------------------------------------------------------------------------------------------------------------------------------------------------------------------------------------------------------------------------------|-----------------------------------------------------------------------------------------------------------------------------------------------------------------------------------------------------------------------------------------------------|----------------------------------------------------------------------------------------------------------------------------------------------------------------------------------------------------------------------------------------------------------------------------------------------------------------------------------------------------------------------------------------------------------------------------------------------|
| Carbone (1)<br>2009 | 36 women with pAPS : 26 obstetric APS without thrombosis (A1) and 10 obstetric APS with thrombosis (A2)<br>36 women with spontaneous recurrent abortion without aPL (B)<br>36 healthy parous women (C)<br>36 healthy non parous women (D) | - Three colour immunophenotyping of peripheral blood lymphocytes (EDTA). Whole Blood Lysis technique.<br>- mAb: CD27 / IgD / CD19<br>- Acquisition: 5000 events in a lymphocyte gate. FACScan.                                                                   | - Naïve (CD19+ CD 27- IgD+)<br>- Memory B cells (class switched CD 19+CD27+IgD- and non-class-switched CD 19+ CD27+IgD+)                                                                                                                            | - No differences in the number and frequency of CD19+ B cells among groups<br>A2: increased frequency and absolute numbers of naïve cells compared to A1 and controls.<br>A2: lower percentage of memory class-switched and non-class switched than A1 and controls.<br>Higher naïve/memory class-switched ratio in A2 compared with controls.                                                                                               |
| Dal Ben (2)<br>2013 | 20 pAPS and 20 HC (85% females)                                                                                                                                                                                                           | PBMCs resuspended in RPMI+FBS and treated with FC blocking. Immunophenotyping with CD3 and CD19.<br>- Acquisition 20000 cells. FACs Canto II. Software analysis: Flow Jo.                                                                                        | CD 3-CD19+ B cells                                                                                                                                                                                                                                  | - Lower percentages of total lymphocytes in APS than controls<br>- Lower percentages of CD3-CD19+ B cells in APS than controls.                                                                                                                                                                                                                                                                                                              |
| Dal Ben(3)<br>2014  | 25 APS related SLE and 25 HC<br>96 % females                                                                                                                                                                                              | No data                                                                                                                                                                                                                                                          | CD3- CD19+ B cells                                                                                                                                                                                                                                  | - No differences of total lymphocytes<br>- Lower numbers of CD3-CD19+ B cells in APS related SLE than in HC                                                                                                                                                                                                                                                                                                                                  |
| Simonin(4)<br>2017  | 11 pAPS VTE (54.5 % females)<br>11 nonAPS VTE<br>49 controls (OA)<br>11 SLE/11 RA/11pSS                                                                                                                                                   | - Four colour immunophenotyping of peripheral blood lymphocytes (EDTA). Whole Blood Lysis technique.<br>- mAb: CD5/ CD27 / IgD / CD19/CD 38/ CD24/<br>- Acquisition 175.000 cells Gating lymphocytes.<br><br>- Beckman Coulter flow cytometer. (Navios + Kaluza) | B1 cells (CD19+ CD 5+)<br>Transitional B cells (CD19+ CD24++ CD 38++)<br>Naïve B cells (CD19+ IgD+CD27-)<br>Unswitched memory B cells (CD 19+ IgD+ CD27+)<br>Switched memory B cells (CD19+ IgD- CD27+)<br>Double negative B cells (CD19+IgD-CD27-) | - No differences in the frequency of CD19+B cells in pAPS VTE compared to controls and SLE<br>- Increase in percentage of B1 cells in pAPS VTE compared to non-APS VTE but not with controls.<br>- Increase in number and frequency of transitional B cells in pAPS VTE compared to nonAPS VTE and controls.<br>- Increase number but not frequency of naïve B cells in pAPSVTE compared to nonAPS VTE. No differences compared to controls. |

|               |                                                                               |                                                                                                                                                                                                                                                                                                                                                                                                           |                                                                                                                                                                                                                                                                                                                                                                                                                                                                                                                                                                                                                                                                                                                                                                                                                                |                                                                                                                                                                                                                                                                                                                                                                                                                                                                                                                                                                                                                                                                                                                                       |
|---------------|-------------------------------------------------------------------------------|-----------------------------------------------------------------------------------------------------------------------------------------------------------------------------------------------------------------------------------------------------------------------------------------------------------------------------------------------------------------------------------------------------------|--------------------------------------------------------------------------------------------------------------------------------------------------------------------------------------------------------------------------------------------------------------------------------------------------------------------------------------------------------------------------------------------------------------------------------------------------------------------------------------------------------------------------------------------------------------------------------------------------------------------------------------------------------------------------------------------------------------------------------------------------------------------------------------------------------------------------------|---------------------------------------------------------------------------------------------------------------------------------------------------------------------------------------------------------------------------------------------------------------------------------------------------------------------------------------------------------------------------------------------------------------------------------------------------------------------------------------------------------------------------------------------------------------------------------------------------------------------------------------------------------------------------------------------------------------------------------------|
|               |                                                                               |                                                                                                                                                                                                                                                                                                                                                                                                           |                                                                                                                                                                                                                                                                                                                                                                                                                                                                                                                                                                                                                                                                                                                                                                                                                                | <ul style="list-style-type: none"> <li>- No differences in the frequency of unswitched compared to nonAPS VTE and controls</li> <li>Decrease number and percentage of SM B cells in pAPS VTE compared to controls.</li> <li>No differences in the frequency of CD19+B cells in pAPS VTE compared to controls and SLE</li> <li>Increase in number and frequency of naïve B cells in pAPS VTE compared to SLE and RA.</li> </ul>                                                                                                                                                                                                                                                                                                        |
| Present study | <p>37 pAPS ( 17 Obstetric pAPS, 20 Trombotic pAPS)<br/> 11 SLE<br/> 21 HC</p> | <ul style="list-style-type: none"> <li>- Six colours immunophenotyping of PBMCs</li> <li>- mAb: CD19, CD5, CD10, IgD , CD27, CD24 and CD38, IgM.</li> <li>Immunophenotyping 500.000 cells/sample.</li> <li>- Acquisition 50000 cells. FACs Canto II.</li> <li>Software analysis: FACS Diva Gating CD19+ cells</li> <li>Absolute numbers and % of lymphocytes by Multitest TruCount method (BD)</li> </ul> | <ul style="list-style-type: none"> <li>Immature(CD19<sup>+</sup>CD5<sup>+</sup>CD10<sup>+</sup> CD27<sup>-</sup>IgD<sup>++</sup> CD24<sup>hi</sup> CD38<sup>hi</sup>).</li> <li>- Naïve (CD19<sup>+</sup> CD5<sup>+/-</sup> CD10<sup>-</sup> CD27<sup>-</sup>IgD<sup>+</sup> CD24<sup>int</sup> CD38<sup>low/-</sup>).</li> <li>- Non-switched memory (CD19<sup>+</sup> CD27<sup>+</sup>IgD<sup>+</sup> CD38<sup>-</sup> IgM<sup>+</sup>),</li> <li>- Switched memory (CD19<sup>+</sup> CD27<sup>+</sup>IgD<sup>-</sup> CD38<sup>+</sup>IgM<sup>+/-</sup>),</li> <li>- Doubles negatives (CD19<sup>+</sup> CD27<sup>-</sup>IgD<sup>-</sup> CD24<sup>-</sup> CD38<sup>-/+</sup> IgM<sup>-</sup>)</li> <li>- Plasma cells (CD19<sup>lo</sup> CD27<sup>hi</sup>IgD<sup>-</sup> CD38<sup>hi</sup> CD138<sup>-/+</sup>).</li> </ul> | <ul style="list-style-type: none"> <li>- No differences in the number and frequency of CD19+ B cells among three groups.</li> <li>- Lower percentage of immature and naïve B cells in pAPS than SLE, especially in obstetric pAPS .No differences between thrombotic pAPS and SLE or HC.</li> <li>- Higher frequency of non-switched memory cells in obstetric and thrombotic pAPS than SLE.No differences between pAPS and HC.</li> <li>- No differences in frequencies of switched memory and plasma cells among three groups.</li> <li>- SLE increased frequency of naive and decreased frequency of non switched memory compared to HC</li> <li>- Higher double negative memory B cells in SLE than HC but not in pAPS</li> </ul> |

pAPS: primary antiphospholipid syndrome, opAPS: obstetric primary antiphospholipid syndrome, SLE: systemic lupus erythematosus, HC: healthy controls, OA: osteoarthritis, RA: rheumatoid arthritis, pSS: primary Sjogren syndrome, VTE: venous thromboembolism.

## Reference List

- (1) Carbone J, Gallego A, Lanio N, Navarro J, Orera M, Aguaron A et al. Quantitative abnormalities of peripheral blood distinct T, B, and natural killer cell subsets and clinical findings in obstetric antiphospholipid syndrome. *J Rheumatol* 2009; 36(6):1217-1225.
- (2) Dal Ben ER, Do Prado CH, Baptista TS, Bauer ME, Staub HL. Decreased levels of circulating CD4+CD25+Foxp3+ regulatory T cells in patients with primary antiphospholipid syndrome. *J Clin Immunol* 2013; 33(4):876-879.
- (3) Dal Ben ER, Do Prado CH, Baptista TS, Bauer ME, Staub HL. Patients with systemic lupus erythematosus and secondary antiphospholipid syndrome have decreased numbers of circulating CD4(+)CD25(+)Foxp3(+) Treg and CD3(-)CD19(+) B cells. *Rev Bras Reumatol* 2014; 54(3):241-246.
- (4) Simonin L, Pasquier E, Leroyer C, Cornec D, Lemerle J, Bendaoud B et al. Lymphocyte Disturbances in Primary Antiphospholipid Syndrome and Application to Venous Thromboembolism Follow-Up. *Clin Rev Allergy Immunol* 2016; 3878: 1-14.

**Table S2. Immunophenotypic characterization of B cell subsets.**

|                            |                                                                                                                                 |
|----------------------------|---------------------------------------------------------------------------------------------------------------------------------|
| <b>Immatures</b>           | CD19 <sup>+</sup> CD5 <sup>+</sup> CD10 <sup>+</sup> CD27 <sup>-</sup> IgD <sup>++</sup> CD24 <sup>hi</sup> CD38 <sup>hi</sup>  |
| <b>Naïve</b>               | CD19 <sup>+</sup> CD5 <sup>+/-</sup> CD10 <sup>-</sup> CD27 <sup>-</sup> IgD <sup>+</sup> CD24 <sup>int</sup> CD38 <sup>-</sup> |
| <b>Non switched memory</b> | CD19 <sup>+</sup> CD27 <sup>+</sup> IgD <sup>+</sup> CD38 <sup>-</sup> IgM <sup>+</sup>                                         |
| <b>Switched memory</b>     | CD19 <sup>+</sup> CD27 <sup>+</sup> IgD <sup>-</sup> CD38 <sup>+/-</sup> IgM <sup>+/-</sup>                                     |
| <b>Doubles negatives</b>   | CD19 <sup>+</sup> CD27 <sup>-</sup> IgD <sup>-</sup> CD24 <sup>-</sup> CD38 <sup>+/-</sup> IgM <sup>-</sup>                     |
| <b>Plasma cells</b>        | CD19 <sup>lo</sup> CD27 <sup>hi</sup> IgD <sup>-</sup> CD38 <sup>hi</sup> CD138 <sup>+/-</sup>                                  |
